# Supplementary material for: Role of Uric Acid in Vascular Remodeling: Cytoskeleton Changes and Migration in VSMCs
Source: MDPI journal article supplement (doi:10.3390/ijms24032960), 2023-02-03
Supplement: s1 [file s1]

## SUPPLEMENTAL MATERIAL

**Figure S1. Probenecid blunted VSMC migratory capacity induced by UA**

A) Graph depicts the inhibitory effects of 10 and 20  $\mu\text{M}$  P after 24 hour exposition to 9 mg/dl UA. B) This effect was confirmed by AlexaFluor 594-Phalloidin staining. The yellow arrows point out F-actin cortical distribution in UA exposed cells, whereas it was absent in P pretreated cells. Magnification X400, scale bar= 50  $\mu\text{m}$ . Results represent means  $\pm$  SEM obtained from three/four independent experiments and are expressed as fold change to CTR. \*\*\* $p < 0.0001$  vs CTR; §§ $p < 0.001$  vs UA treated cells.

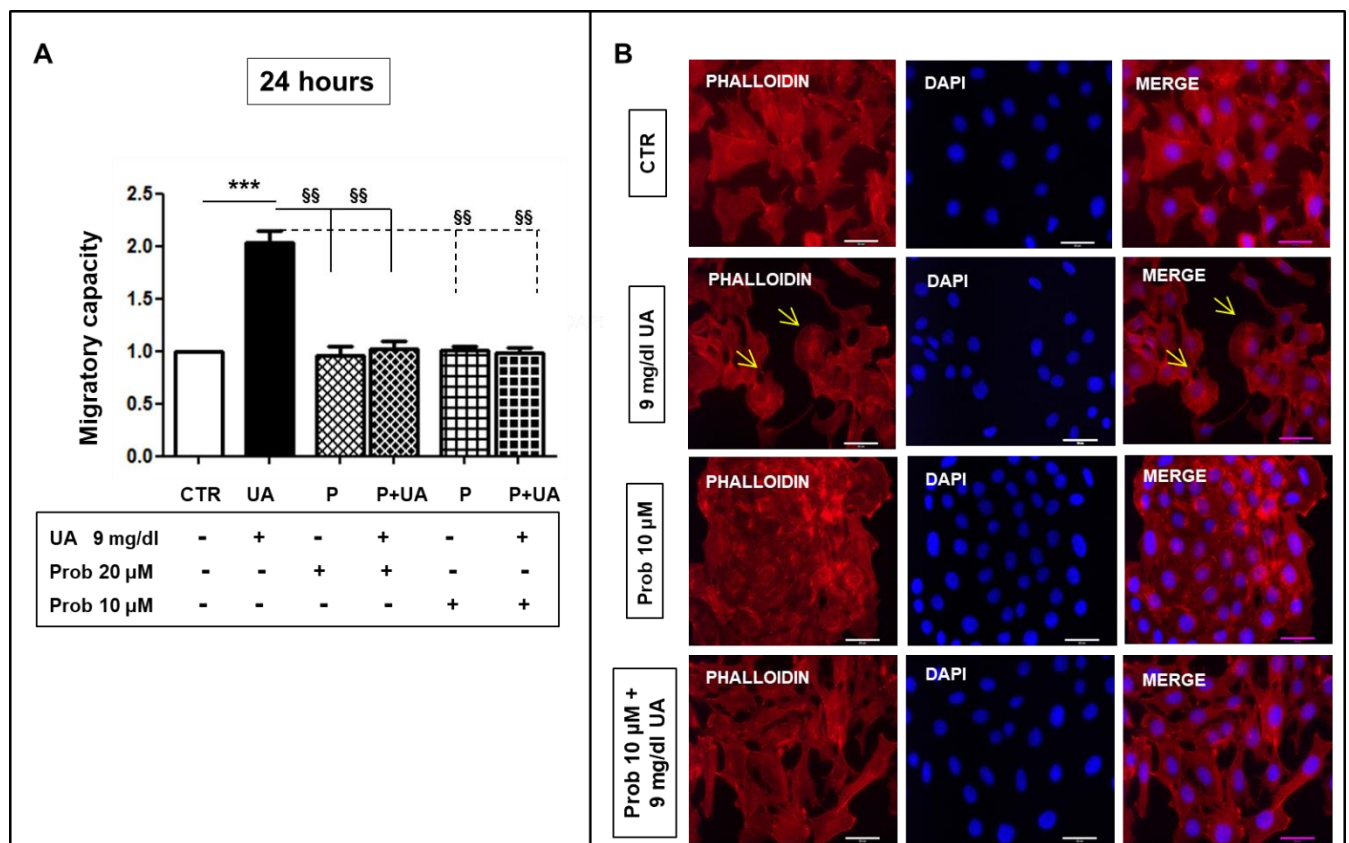

P=Probenecid; VSMC= Vascular smooth Muscle cells; UA=Uric Acid; ; CTR= control untreated cells.

**Figure S2. Atrogin-1 and  $\alpha$ -SMA expression after 48 hrs VSMC exposition to Probenecid and 9 mg/dl UA.**

A) In UA treated cells, 10  $\mu$ M P treatment down regulated Atro-1 mRNA, detected by rt-PCR.  
 B-C) Atro-1 protein expression, evaluated by immunofluorescence and reported as CTCF, was decreased. C) P induced changes in expression and distribution of Atro-1 (red) and  $\alpha$ -SMA (green). Signal intensities were evaluated by Image J in at least 100 cells for condition from three independent experiments. rt-PCR results represent means  $\pm$  SEM obtained from three/four independent experiments and are expressed as fold change to CTR.  
 \*  $p < 0.05$  vs CTR,  $\S$   $p < 0.05$  vs UA treated cells. Magnification= X400, scale bar= 50  $\mu$ m.

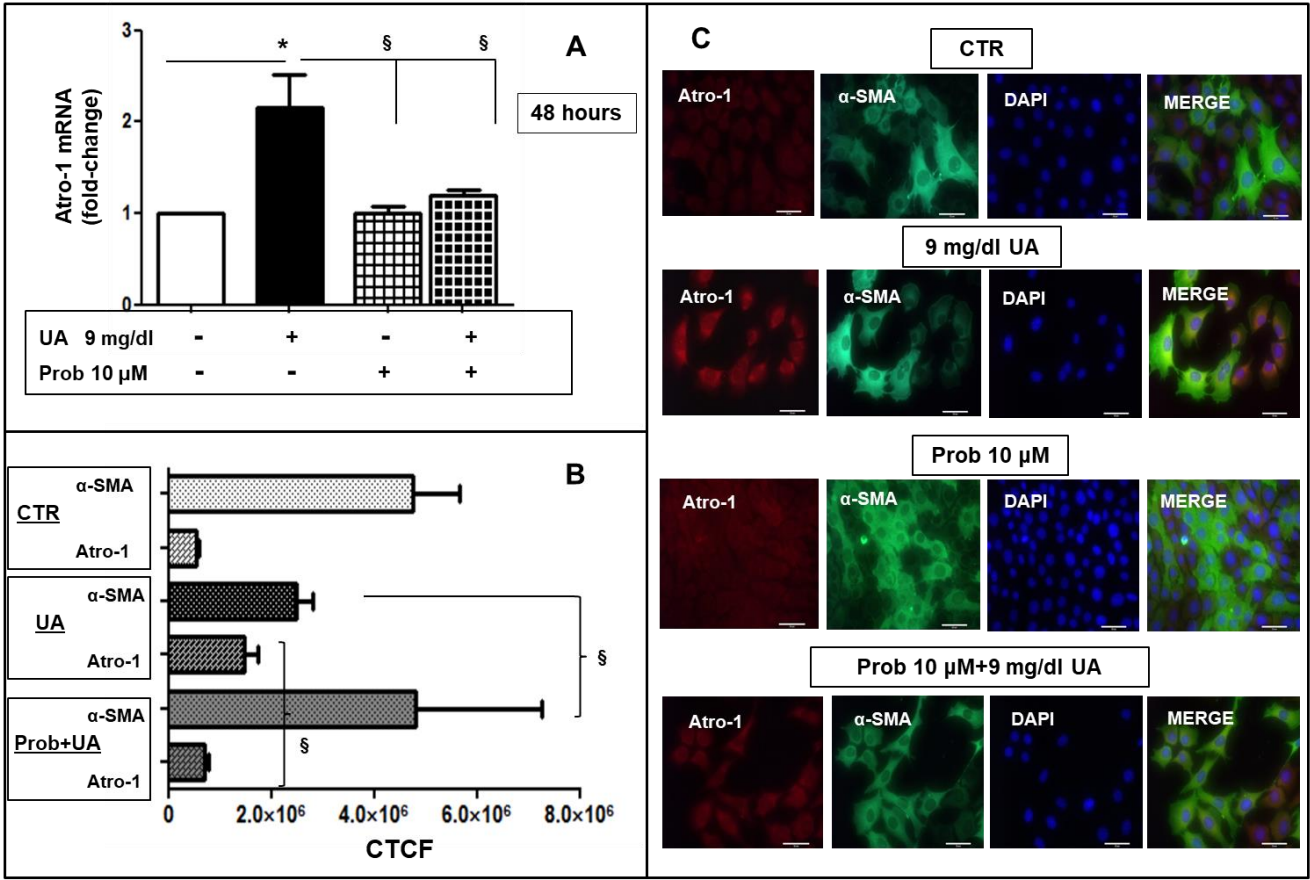

Atro-1=Atrogin-1;  $\alpha$ -SMA=  $\alpha$ -Smooth muscle actin; P=Probenecid; VSMC= Vascular Smooth Muscle Cells; UA=Uric Acid; rt-PCR= real time PCR; CTR= control untreated cells; CTCF= Corrected Total Cell Fluorescence; DAPI= 4',6-diamidino-2-phenylindole.
